# Supplementary material for: Hydrogen bond formation between the naturally modified nucleobase and phosphate backbone
Source: PubMed Central journal article supplement — Nucleic Acids Res. 2012 May 28;40(16):8111–8. doi: 10.1093/nar/gks426 (PMC3439885; doi:10.1093/nar/gks426), 2012-05-28
Supplement: supp_gks426_nar-00350-f-2012-File002.pdf [file supp_gks426_nar-00350-f-2012-File002.pdf]

## Supporting Information

# Hydrogen Bond Formation between the Naturally Modified Nucleobase and Phosphate Backbone

Jia Sheng<sup>1</sup>, Wen Zhang<sup>1</sup>, Abdalla E. A. Hassan<sup>1</sup>, Jianhua Gan<sup>1</sup>, Alexei S. Soares<sup>2</sup>, Geng Song<sup>3</sup>, Ren Yi<sup>3</sup> and Zhen Huang<sup>1\*</sup>

<sup>1</sup>Department of Chemistry, Georgia State University, Atlanta, GA, 30303, USA; <sup>2</sup>Department of Biology, Brookhaven National Laboratory, Upton, NY 11973, USA; <sup>3</sup>College of Chemistry, and Key State Laboratory of Biotherapy, Sichuan University, Chengdu, 610064, China.

\*To whom correspondence should be addressed. Tel: +1 404 413 5535; Fax: +1 404 413 5535; Email: Huang@gsu.edu

**Table S1.** Numbers of Types of Modified Natural RNAs<sup>a</sup>

| Modified Nucleosides and Nucleobases | No. in tRNA | No. in rRNA | No. in mRNA | No. in tmRNA | No. in snRNA | No. in chromosomal RNA | No. in other small RNA | Total No. in all RNA modifications (%) <sup>b-d</sup> |
|--------------------------------------|-------------|-------------|-------------|--------------|--------------|------------------------|------------------------|-------------------------------------------------------|
| <b>Uridine</b>                       | <b>35</b>   | 11          | 2           | 2            | 4            | 2                      | 1                      | 41 (37.6)                                             |
| Uracil                               | 34          | 10          | 1           | 2            | 3            | 2                      | 1                      | 40 (36.7)                                             |
| <i>Uracil Position-5</i>             | 26          | 2           | 0           | 1            | 0            | 1                      | 0                      | 28 (25.7)                                             |
| <b>Adenosine</b>                     | <b>18</b>   | 5           | 4           | 0            | 3            | 0                      | 0                      | 21 (19.3)                                             |
| Adenine                              | 16          | 5           | 3           | 0            | 2            | 0                      | 0                      | 20 (18.3)                                             |
| <b>Cytidine</b>                      | <b>11</b>   | 8           | 2           | 0            | 1            | 0                      | 0                      | 14 (12.8)                                             |
| Cytosine                             | 11          | 7           | 1           | 0            | 0            | 0                      | 0                      | 14 (12.8)                                             |
| <b>Guanidine</b>                     | <b>18</b>   | 5           | 4           | 0            | 3            | 0                      | 0                      | 20 (18.3)                                             |
| Guanine                              | 16          | 4           | 3           | 0            | 2            | 0                      | 0                      | 18 (16.5)                                             |
| <b>Inosine</b>                       | <b>3</b>    | 1           | 1           | 0            | 0            | 0                      | 0                      | 4 (3.7)                                               |
| <b>7-deazaguanine</b>                | <b>7</b>    | 0           | 0           | 0            | 0            | 0                      | 0                      | 7 (6.4)                                               |

a: based on the RNA modification database (<http://rna-mdb.cas.albany.edu/RNAmods/>)

b: no modification has been found on the phosphate backbones.

c: the total number of nucleoside modification types is 109

d: the total number of nucleobase modification types is 103

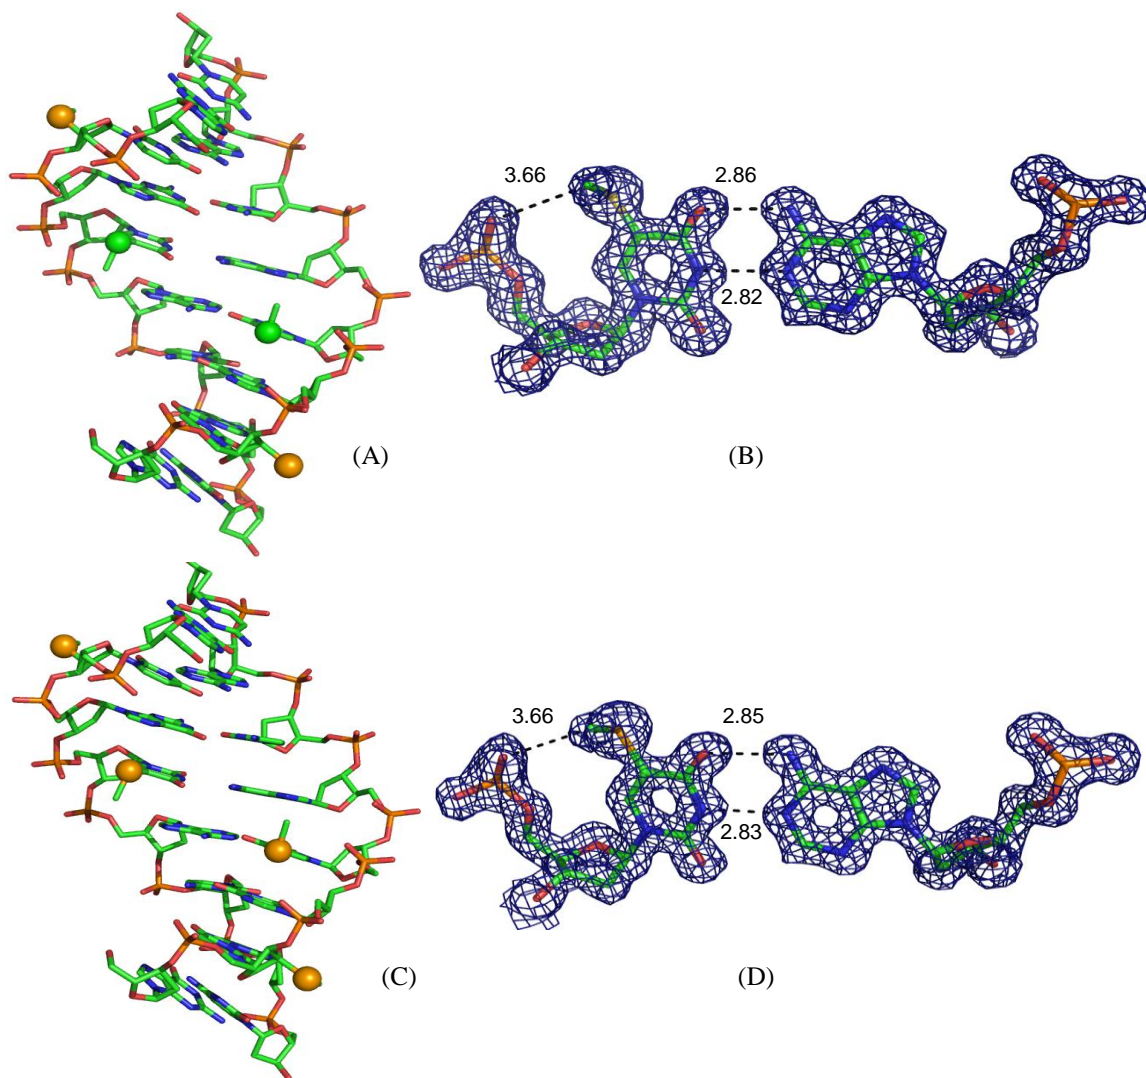

**Figure S1.** (A) X-ray crystal structure of A-form DNA **3b** [5'-G(dU<sub>Se</sub>)G(ms<sup>5</sup>dU)ACAC-3']<sub>2</sub> at 1.38 Å resolution (PDB ID: 3IKI). (B) Electron density map of ms<sup>5</sup>dU/A base pair,  $\delta = 1.0$ . (C) X-ray crystal structure of A-form DNA **3c** [5'-G(dU<sub>Se</sub>)G(mSe<sup>5</sup>dU)ACAC-3']<sub>2</sub> at 1.40 Å resolution (PDB ID: 3LTU). (D) Electron density map of mSe<sup>5</sup>dU/A base pair,  $\delta = 1.0$ . Yellow and green balls represent selenium and sulfur atoms of the modified moieties, respectively.

**Table S2.** UV melting temperatures of the DNA duplexes containing 5-O-Me, 5-S-Me and 5-Se-Me

| Entry | Oligonucleotides                                           | Base Pair           | T <sub>m</sub> (°C) |
|-------|------------------------------------------------------------|---------------------|---------------------|
| 1     | 5'-ATGGTGTCTC-3'<br>3'-TACCACGAG-5'                        | T/A                 | 40.3                |
| 2     | 5'-ATGG( <sup>5-O</sup> T)GCTC-3'<br>3'-TACC----A-CGAG-5'  | <sup>5-O</sup> T/A  | 40.1                |
| 3     | 5'-ATGG( <sup>5-S</sup> T)GCTC-3'<br>3'-TACC----A-CGAG-5'  | <sup>5-S</sup> T/A  | 39.8                |
| 4     | 5'-ATGG( <sup>5-Se</sup> T)GCTC-3'<br>3'-TACC----A-CGAG-5' | <sup>5-Se</sup> T/A | 39.3                |

The melting temperatures of the 5-modified DNA duplexes were measured. Denaturation curves were acquired at 260 nm and with 1 cm path length at heating or cooling rates of 0.5 °C/min, using a UV-Vis spectrophotometer equipped with a six-sample thermo-stated cell block and a temperature controller. The experiments were performed using the DNA samples (duplexes, 1.0 μM) dissolved in the buffer of 50 mM NaCl, 10 mM NaH<sub>2</sub>PO<sub>4</sub>-Na<sub>2</sub>HPO<sub>4</sub> (pH 6.5), 0.1 mM EDTA, and 10 mM MgCl<sub>2</sub>.
